# Supplementary material for: Comparison of different Aethalometer correction schemes and a reference multi-wavelength absorption technique for ambient aerosol data
Source: Copernicus journal article supplement (doi:10.5194/amt-2016-361), 2016-12-13
Supplement: Supplementary file 1 [file amt-2016-361-supplement.pdf]

## Supplementary material

**Table S1.** Constants  $C^*$  and  $m_s$  taken from Arnott et al. (2005)

| Wavelength (nm) | $C^*$ | $m_s$  |
|-----------------|-------|--------|
| 370             | 1.813 | 0.0335 |
| 470             | 2.073 | 0.0457 |
| 520             | 2.076 | 0.0523 |
| 590             | 2.104 | 0.0616 |
| 660             | 2.182 | 0.0713 |
| 880             | 2.226 | 0.1038 |
| 950             | 2.199 | 0.1148 |



## Filter loading correction

Comparison between Schmid et al. and Collaud Coen et al.

The ratio between attenuation coefficients and the MAAP absorption coefficients (expressed as  $C_{\text{ref}}$ ) should not depend on ATN after applying the filter-loading correction. Figure S2 shows  $C_{\text{ref}}$  as a function of ATN, after applying both filter-loading corrections. The result of both corrections is quite similar and the slopes obtained by orthogonal fits are statistically equivalent. The drop observed in  $C_{\text{ref}}$  for  $\text{ATN} > 30\%$  in the Schmid correction was also obtained by Collaud Coen et al. (2010) in a sampling site located far from the sources, where the aerosol was characteristically aged and SSA was close to 1.

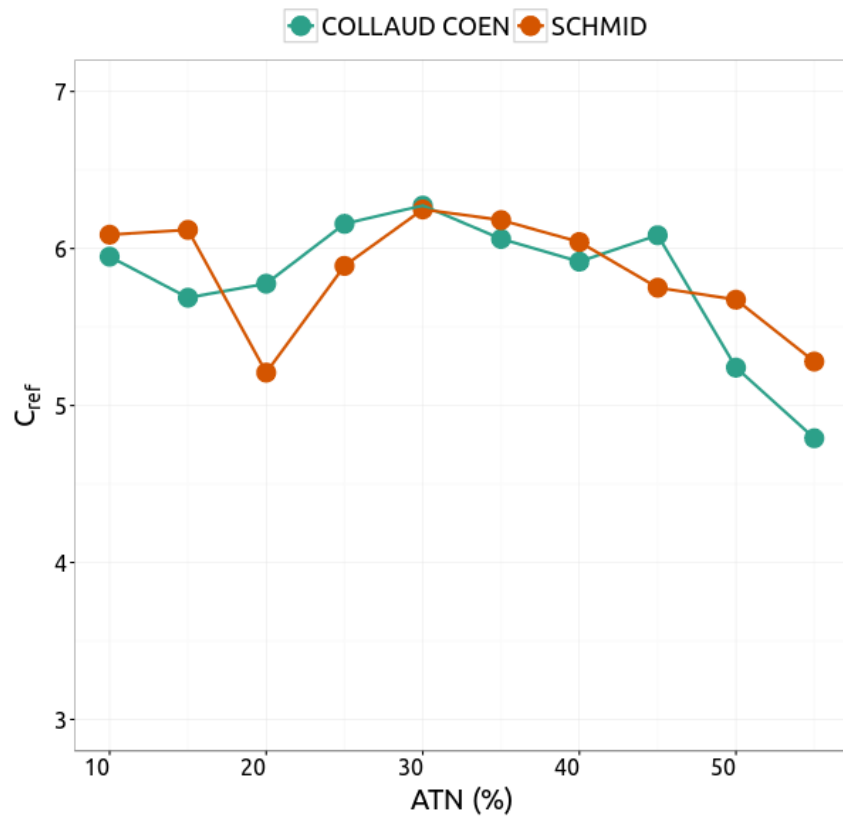

**Figure S2.**  $C_{\text{ref}}$  obtained by following Schmid and Collaud Coen corrections as a function of 5%-wide attenuation bins.

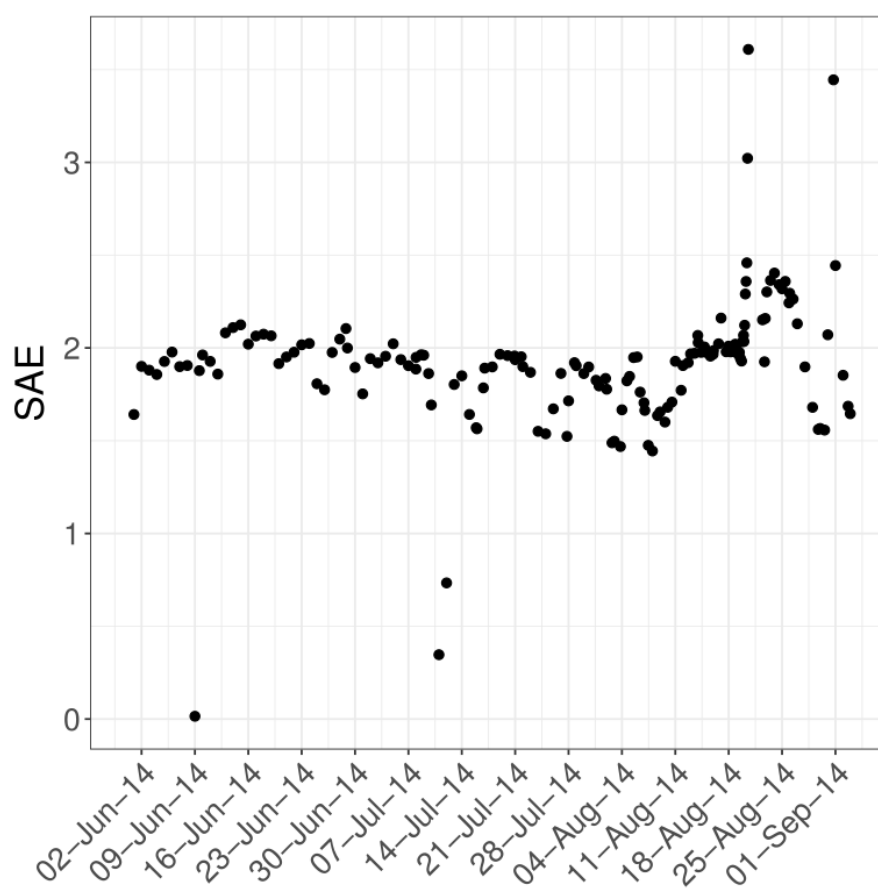

**Figure S3.** Scattering Ångström exponent,  $\text{\AA}_{\text{SCA}}$ , averaged over MAAP filter sampling times.

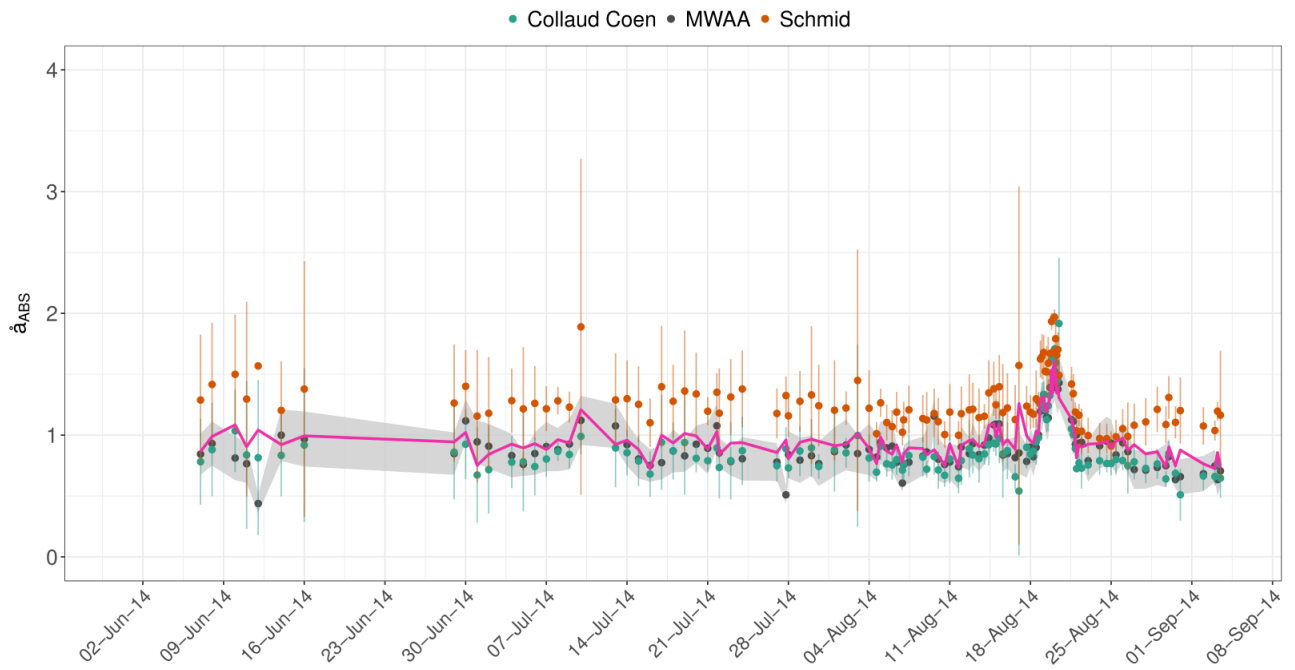

**Figure S4.** Absorption Ångström exponent retrieved from Schmid and Collaud Coen correction algorithms averaged over MWAA sample intervals plotted together with the attenuation Ångström exponent (magenta line).

## **Software**

We used the statistical software environment R (R Development Core Team, 2009) to process the data presented in this work. When comparing two different datasets, resulting from different instruments or different corrections, we used the package SMATR (Falster et al., 2006; Warton et al., 2012) to apply standardized major axis (SMA) estimations.

The scripts implemented in this work are available under GPLv3 license at:  
<https://dx.doi.org/10.6084/m9.figshare.c.3501153.v1>

## **References**

Falster, D. S., Warton, D. I. and Wright, I. J.: SMATR: Standardised major axis tests and routines, ver 2.0, 2006.

R Development Core Team: R: A language and environment for statistical computing, [online]  
Available from: <http://www.r-project.org>, 2009.

Warton, D. I., Duursma, R. A., Falster, D. S. and Taskinen, S.: smatr 3- an R package for estimation and inference about allometric lines, *Methods Ecol. Evol.*, 3(2), 257–259, doi:10.1111/j.2041-210X.2011.00153.x, 2012.
